# Supplementary material
Source: Research Square preprint supplement (doi:10.21203/rs.3.rs-9984265/v1)
Supplement: Supplementary file 1 [file 02f5b8945da254dc6cf1c6d9.docx]

## Additional file 2: Conceptualising elements of different models

Within the broader literature concerned with trauma-responsive approaches, there is wide variation and limited consensus on what perspective to take, and what the key building blocks of each approach should be. Clinically focused models tend to stress the distinction between evidence-based clinical treatments and therapeutic cultures (James, 2015). Others draw a distinction between structure and action (Karhu et al, 2025) or between micro, meso and macro-social strata. Arguably, a stronger focus on implementation is taken by models that focus on organisational levels (Improvement Service, 2023) or make a distinction between implementation and practice (Baker et al, 2016; Harris & Fallot, 2001). Alternatively, a focus on organisational behavioural psychology results in models that examine influences on behaviour and wellbeing through interactions of individuals in sensory, interpersonal and organisational environments (Robinson & Philpot, 2016; Burbridge et al, 2020; Parry, 2021).

Table 1: Elements of trauma-responsive models

| **Reference** | **Perspective** | **Elements** |
| --- | --- | --- |
| James et al, 2015[1] | Treatment and therapeutic culture | - Evidence-based treatment approach - Milieu-based approach (physical & social environment/culture |
| Karhu et al, 2025[2] | Relational and structural dynamics | - Dyadic approach (interactions and individual relationships) - Systemic approach (service, organisation, system) |
| Forrest et al, 2018[3] | Three ecological systems | - Individual system (personal routines, needs, and habits) - Community system (open communication, boundaries, and safety) - External system (includes the training of staff members and policies) |
| Improvement Service, 2023[4] | Organisational management levels | - Workforce - Organisations - Systems |
| Baker et al, 2018[5] & Harris & Fallot, 2001[6] | Implementation & Practice | - Implementation drivers that promote TIC - Practice elements that constitute TIC |
| Robinson & Philpot, 2016[7]; Burbidge et al, 2020[8]; Parry et al, 2021[9] | Therapeutic parent | - Environmental - Sensory - Interpersonal - Individual - Organisational |

References

1. James S, Thompson R, Sternberg N, Schnur E, Ross J, Butler L, Triplett D, Puett L, Muirhead J. Attitudes, Perceptions, and Utilization of Evidence-Based Practices in Residential Care. Resid Treat Child Youth. 2015; doi:10.1080/0886571X.2015.1046275.

2. Karhu VM, Peltonen A, Flykt M. Dyadic and Systemic Trauma-Informed Care in Adolescent Residential Settings: A Systematic Review of Outcomes for Staff, Youth, and Relationships. SSRN. 2025; doi:10.2139/ssrn.5169945.

3. Forrest S, Gervais R, Lord KA, Sposato A, Martin L, Beserra K, Spinazzola J. Building communities of care: A comprehensive model for trauma-informed youth capacity building and behavior management in residential services. Residential Group Care & Treatment. 2018;35(4):265–285; doi:10.1080/0886571X.2018.1497930.

4. Improvement Service. Care experience and trauma-informed practice: companion document. 2023.

5. Baker CN, Brown SM, Wilcox P, Verlenden JM, Black CL, Grant BE. The implementation and effect of trauma-informed care within residential youth services in rural Canada: A mixed methods case study. Psychol Trauma. 2018; doi:10.1037/tra0000327.

6. Harris M, Fallot RD. Envisioning a trauma-informed service system: a vital paradigm shift. New Dir Ment Health Serv. 2001; doi:10.1002/yd.23320018903.

7. Robinson C, Philpot T. Healing Child Trauma Through Restorative Parenting: A Model for Supporting Children and Young People: London: Jessica Kingsley Publishers; 2016.

8. Burbidge CE, Keenan J, Parry S. "I've made that little bit of difference to this child": Therapeutic parent's experiences of trials and triumphs in therapeutic children's homes. Journal of Workplace Behavioral Health. 2020; doi:10.1080/15555240.2020.1821205.

9. Parry SL, Williams T, Burbidge C. Restorative parenting: Delivering trauma-informed residential care for children in care. Child & Youth Care Forum. 2021;50(6):991–1012; doi:10.1007/s10566-021-09610-8.
