# Supplementary material
Source: Research Square preprint supplement (doi:10.21203/rs.3.rs-9984265/v1)
Supplement: Supplementary file 2 [file 7e884eb93a5977cf09fa0f74.docx]

## Additional file 3: Initial Programme Theory CMOCs

## Initial Programme Theory: CMOCs

- Topic 1, Trauma-Responsive Organisational Culture
- Topic 2, Therapeutic Relationships and Dyadic Models
- Topic 3, Staff Wellbeing and Support
- Topic 4, Training and Implementation Quality
- Topic 5, System-Level Integration and Structural Supports
- Topic 6, CYP-Centred Practice and Empowerment
- Topic 7, Enabling change

Topic 1, CMOCs Trauma-Responsive Organisational Culture

| **ID** | **Topic** | **Context** | **Mechanism** | **Outcomes** | **Examples** |
| --- | --- | --- | --- | --- | --- |
| 1.1.0a | Addressing root causes of staff moral distress | When organisations have practices and policies that align with staff values regarding TRAs | Because they experience less dissonance around meeting therapeutic needs of CYP | Staff are less likely to experience moral distress | Brend, 2020 & 2025, Kor, 2021; Improvement Service, 2023 |
| 1.1.0b |  | When TRAs reduce staff exposure to moral distress | Because they have improved job satisfaction and wellbeing | They are less likely to experience burnout | Brend, 2020 & 2025; Kor, 2021; Improvement Service, 2023 |
| 1.1.0c |  | When members of staff are less likely to experience burnout | Because they are less likely to consider leaving the organisation or sector | Homes are better able to implement TRAs through more reliable staff attendance and better retention | Brend, 2020 & 2025; Bailey, 2018; Kor, 2021 |
| 1.2.0a | Recognising and addressing staff distress | When homes have policies and procedures that proactively and systematically implement TRA for dealing with signs and symptoms of staff distress | Because they are better able to deal with any distressing experiences | Staff have improved resilience | Brend 2025; Parry, 2021; Steinkopf, 2022a |
| 1.2.0b |  | When TRAs result in staff having more resilience in dealing with distressing experiences | Because they are better able to manage negative emotions | They more rapidly and more fully recover from distress | Burbage, 2020; Milne, 2024; Karhu, 2025; Parry, 2022; Steinkopf, 2021 |
| 1.2.1 |  | When training about (vicarious) trauma results in staff feeling worse in the short term | Because trainees cannot adequately address issues on their own and outside of work | Trainees need organisational interventions to facilitate the process of addressing trauma or lessening their experience of trauma | Baker, 2018 |
| 1.3.0a | Reflective Practice and Emotional Regulation | When staff have the opportunity and means to reflect on the negative emotions they experience at work through using TRAs | Because they are better able to process and regulate these emotions | They are better able to engage in appropriate therapeutic care | Brend, 2025; Bailey 2018; Improvement Service, 2023, Steinkopf, 2022b |
| 1.3.0b |  | When staff have the opportunity and means to reflect on the application of their knowledge and training in TRAs | Because they can consider the application of TRAs to new situations and experiences | They are better able to engage in appropriate therapeutic care in a wider variety of circumstances | Dacre, 2020; Haffejee, 2024; Negrão, 2024; Steinkopf, 2022b |
| 1.3.1a |  | When staff are better able to engage in appropriate therapeutic care in a wider variety of circumstances | Because they have improved job satisfaction | They have improved wellbeing | Burbage, 2020; Milne, 2024; Parry, 2022 |
| 1.3.1b |  | When staff are better able to engage in appropriate therapeutic care | Because they have reduced moral distress | They are less likely to experience burnout | Brend, 2025 |
| 1.3.2 |  | When staff have resources and time for reflective practice and emotional regulation as part of their daily work routines | Because staff thinking is more likely to shift from a ‘managing behaviour’ to an ‘understanding distress’ mindset | The home is more likely to have a positive therapeutic culture | Crawford, 2024; Cross, 2012; Steinkopf, 2022a & 2022b |

Topic 2, CMOCs Therapeutic Relationships and Dyadic Models

| **ID** | **Title** | **Context** | **Mechanism** | **Outcome** | **Examples** |
| --- | --- | --- | --- | --- | --- |
| 2.1.0 | Attachment and Mentalisation | When staff have appropriate training, education and resources to support reflective relationship building | Because they have a better understanding of mental states, that underlie behaviour (reflective functioning of caregivers) | This aids the development of secure attachments | Negrão, 2024; Haffejee, 2024 |
| 2.1.1 |  | If there is formation of secure relationships and positive attachments between staff and CYP | Because CYP have positive adaptations to adversity | They have improved emotional development/ regulation | MacDonald, 2023 |
| 2.2.0 | Reciprocal restorative relationships | When staff have training, education and resources to support the development of Reciprocal Restorative Relationships | Because the staff know how to develop mutual emotional investment between themselves and CYP | This can develop trust and shared responsibility | Haffejee, 2024 |
| 2.2.1 |  | When relationships between staff and CYP are characterised by trust and shared responsibility | Because these relationships can help to repair emotional harm | There are improved wellbeing and developmental outcomes for CYP | Haffejee, 2024 |
| 2.3.0 | ‘Connection before correction’ | When the organisation has effective policies and practices to replace behaviour management with alternative strategies | Because there is a culture that prioritises relationships over behaviour-management | There are reduced punitive and emotionally unsafe practices | Improvement Service, 2023 |
| 2.3.1 |  | When staff have training, education and resources to support appropriate responses to challenging situations | Because members of staff understand how to act in ways that prioritise relationships over behaviour-management | There are reduced punitive and emotionally unsafe practices | Matte-Landry, 2022; Steinkopf, 2022 |
| 2.4.0 | Focus on nurturing relationships | When the organisation has effective policies and practices that do not prioritise functional tasks, but support, encourage and promote nurturing activities (e.g. sharing tasks between staff and CYP) | Because staff know they should not feel anxious about prioritising nurturing activities | This results in stronger therapeutic relationships and emotional safety | Dacre, 2020; Improvement Service, 2023 |
| 2.5.0 | TRAs improve working relationships | When staff are trained in TRAs | Because TRAs, with their emphasis on relationships as the primary agent of therapeutic change, can affect all relationships within the organization | Then they have positive changes in their relationships with coworkers, supervisors, and outside professionals | Baker, 2018 |

Topic 3, CMOCs Staff Wellbeing and Support

| **ID** | **Title** | **Context** | **Mechanism** | **Outcome** | **Examples** |
| --- | --- | --- | --- | --- | --- |
| 3.1.0 | Trauma and distress leading to difficulty providing therapeutic care, burnout and staff turnover | When a program, organization, or system follows a trauma-responsive approach that acknowledges moral distress | Because there is a realisation of the widespread impact of moral distress and understanding of potential paths for prevention and mitigation | There is fully integrated knowledge about moral distress in policies, procedures, and practices, to prevent moral events occurring | Brend, 2020 |
| 3.1.1a |  | When there are effective policies and practices, that support recognition and appropriate responses to causes and symptoms of different forms of staff distress | Because their views are heard and valued | Members of staff are more likely to feel they have permission to notice and understand their emotions and apply regulation techniques, to provide better therapeutic care | Kabir, 2025a |
| 3.1.1b |  | When there are effective policies and practices, that support recognition and appropriate responses to causes and symptoms of different forms of staff distress | Because members of staff are more likely to notice and understand their emotions and apply regulation techniques | This can improve staff wellbeing by reducing staff burnout, secondary trauma, and compassion fatigue | Steinkopf, 2021 & 2022; Brend 2020; Burbage, 2020 |
| 3.1.2 |  | When there is an organisational culture of shared values and support for emotional regulation | Because staff feel comfortable acting on a shared understanding of CYPs behaviours as a product of dysregulated states | This can lead to more effective interventions, and reduced insensitive and punishing responses | Burbage, 2020; Galvin, 2021; LeBel, 2014; Negrão, 2024; Steinkopf, 2022a |
| 3.1.3 |  | When staff have training, education and resources to support recognition and appropriate responses to causes and symptoms of different forms of staff distress | Because they are better able to recognise and respond appropriately to their own and colleagues’ distress | Members of staff have improved wellbeing | Brend, 2025; Haffejee, 2024 |
| 3.2.0 | Workplace Social Support and Supervision | When members of staff are involved in supportive conversations through peer support and supervision | Because of widespread awareness and normalisation of action related to TRAs | This is important for sustaining TRAs through shared organisational values and teamworking | Negrão, 2024; Vamvakos, 2024 |
| 3.2.1 |  | When members of staff are involved in supportive conversations through peer support and supervision | Because of reinforcing training and learning in TRAs | They are better able to provide therapeutic care | Parry, 2022; Vamvakos, 2024 |
| 3.2.2 |  | When members of staff are involved in supportive conversations through peer support and supervision | Because staff feel emotional safety, trust and have improved emotional regulation | Staff have improved wellbeing and protection against burnout | Parry, 2022 |
| 3.2.3 |  | When there are strong collegial relationships among residential care staff | Because they feel understood and have access to social support | Staff wellbeing and resilience improve | Burbage, 2020 |
| 3.3.0 | Professional identity, organisational recognition and belonging | When organisations implement TRAs | Because this supports feelings of being invested in and belonging and recognition of the value of their work by others | It can lead to improved job satisfaction | Parry, 2022 |
| 3.4.0 | Support for Managers | When managers have access to internal and external support | Because other people can provide practical solutions to problems, as well as providing containment, validation and psychological services in difficult situations | This can protect Managers’ wellbeing and prevent them feeling challenged and isolated | Kabir, 2025b |

Topic 4, CMOCs Training and Implementation Quality

| **ID** | **Title** | **Context** | **Mechanism** | **Outcome** | **Examples** |
| --- | --- | --- | --- | --- | --- |
| 4.1.0 | Practical, Relevant Training | When staff have trauma-responsive training that is experiential, context-specific and practically based | Because they envisage the practical value of TRAs | There is increased normalisation and embedding of TRAs | Burbage, 2020; Lang, 2016 |
| 4.1.1 |  | When staff have trauma-responsive training that is experiential, context-specific and practically based | Because they envisage the practical value of TRAs | Staff develop consensus around the importance of TRAs as a lever for change | Kabir, 2025a |
| 4.1.2 |  | When staff have trauma-responsive training that is experiential, context-specific and practically based | Because they can understand how to apply TRAs in everyday work (the approaches have meaning for them) | They have increased confidence in applying TRAs | Burbage, 2020 |
| 4.1.3 | Regularly refreshed Practical, Relevant Training | When staff have trauma-responsive training that is experiential, context-specific and practically based that is regularly refreshed | Because staff have the opportunity discuss and resolve any challenges they have | They are better able to acquire and deepen knowledge about TRAs | Bailey, 2018; Brend, 2025; Topitzes, 2019; Vamvakos, 2024 |
| 4.1.4 |  | When staff have training that is regularly refreshed | Because of reinforcement of positive behavioural and cognitive habits | Benefits of training will tend to increase, rather than dropping off over time | Brend, 2025; Topitzes, 2019; Vamvakos, 2024 |
| 4.1.5 | TRA training reduces punitive practices | When training helps staff feel more informed on how previous trauma experiences impact the current needs of young people | Because they have an improved understanding of better approaches to take | Staff steer away from trying to discipline behaviours that were viewed as ‘challenging' and instead focus on setting future goals and supporting young people towards healing | Chen, 2025; Haffejee, 2024; Matte-Landry, 2022; Negrão, 2024; Steinkopf, 2022a; |
| 4.2.0 | Barriers to implementation: Standardised training | When training is adapted to the unique setting | Because stakeholders appreciate the relevance of TRAs in their setting | There is reduced resistance towards implementation of new ways of working | Haffejee, 2024; Chen, 2025; Crawford, 2024; Lang, 2016; Steinkopf, 2022b; Vamvakos, 2024 |
| 4.2.1 | Barriers to implementation: Lack of clarity | When responsibilities and routes to application of TRAs are clearly defined | Because of clarity of expectations and preferred actions | There is less danger of reverting to old ways of working | Kor, 2021; Vamvakos, 2024 |
| 4.2.2 | Barriers to implementation: Resource constraints | When appropriate practical supportive resources are provided | Because staff are aware of and easily able to find solutions to challenges | There is less danger of reverting to old ways of working | Brend, 2020; Burbage, 2020; Galvin, 2021; Improvement Service, 2023; Vamvakos, 2024 |
| 4.2.3 | Barriers to implementation: organisational commitment does not prioritise TRAs | When there is evidence of organisational commitment (e.g. appropriate supportive resources provided) | Because staff believe that TRAs should be prioritised | Changes are sustained and there is less danger of reverting to old ways of working | Esaki, 2014; Galvin, 2021 & 2022 |
| 4.2.4 | Barriers to implementation: not using inclusive approaches to address barriers | If barriers are identified and addressed as a team | Because team members feel ownership of changes and take responsibility for success | There is a better chance of barriers being overcome | Bright, 2010; Dacre, 2020; Collins-Comargo, 2019; Crawford, 2024; Esaki, 2014, Galvin, 2022 |
| 4.2.5 | Barriers to implementation: not using inclusive approaches | When the knowledge and experience of all members of the team is valued and incorporated through co-design of TRAs | Because people feel included | There is less chance of resistance to change | Bright, 2010; Esaki, 2014; Galvin, 2021; Vamvakos, 2024 |
| 4.2.6 |  | When the knowledge and experience of all members of the team is valued and incorporated through co-design of TRAs | Because changes are more likely to be relevant to local challenges | There are more opportunities to achieve best results | Dacre, 2020; Esaki, 2014; LeBel, 2014; Parry, 2021; Vamvakos, 2024 |
| 4.2.7a | Barriers to implementation: Lack of long-term commitment to implementation | When implementation of TRAs is treated as a long-term project, rather than a one-off event | Because of the application of new principles and to new areas or problems | This will lead to habitual adoption over time | Baker, 2018; Galvin, 2021 & 2022; |
| 4.2.7b |  | When organisations implement time-limited TRA training for leaders, one-off professional development trainings for staff, and even adoption of trauma-focused interventions for clinicians | Because culture-change takes repeated efforts and time | Then this is still unlikely to be sufficient to promote true culture change toward a TRA | Baker 2018, Esaki, 2014; Lang, 2016 |
| 4.2.7c |  | When staff are trained in TRAs (specifically ‘Risking Connection’ (RC; Saakvitne et al., 2001) and ‘Restorative Approach’ (RA; Wilcox, 2012)) this increases their knowledge about, willingness to acknowledge, and get validation for trauma experiences | Because of response shift (i.e. previously they considered their experience of vicarious trauma to be an individual problem that resulted from their own deficiencies) | Then burnout scores and vicarious trauma scores increased | Baker 2018 |
| 4.2.8a | Barriers to implementation: legacy of behaviourist approaches | When staff are not confident that new ways of working will effectively prevent 'behavioural' difficulties | Because staff are reluctant to abandon the use of consequences or restrictive measures (reinforcement and punishment) | Then, rather than leading to a fundamental change in care practices, TRA principles are interpreted through a ‘behaviourist lens' | Lowenthal, 2026; Matt -Landry, 2024 |
| 4.2.8b | Barriers to implementation: legacy of behaviourist approaches | When TRA principles are interpreted through a ‘behaviourist lens' | Because staff prioritise compliant 'behaviour' over positive development | Then “good behaviour” can be mistaken for progress, even when it masks distress or disengagement | Lowenthal, 2026; Strömpl, 2024 |
| 4.2.9 | Barriers to implementation: long-term staff | When staff have been working in the organisation for a long time | Because they have learned approaches that alleviate their fear of losing authority and control | Then staff can be resistant to new relational ways of working | Pulgar, 2025 |
| 4.3.0 | Leadership and Champions | When organisational leadership proactively and visibly supports the shift to TRAs | Because leadership provides legitimacy by modelling expectations and authorising working practices that support TRAs (signalling) | Then this can help overcome resistance to new ways of working that require significant changes and redistribution of resources | Brend, 2020 & 2025; Collins-Comargo, 2019; Kabir, 2025a |
| 4.3.1 |  | When there are Clear routes for TRA support, such as people available for advice, information or discussion (e.g. trauma champions/ buddies & supervisors) | Because staff know who they can turn to for help | This leads to improved individual knowledge development and confidence in applying skills for TRAs | Bailey, 2018; Brend, 2020 & 2025; Crawford, 2024; Haffejee, 2024; Improvement Service, 2023; Topitzes, 2019 |
| 4.3.2 |  | When there are acceptable, non-blaming routes to support for applying TRAs | Because there are no negative repercussions | Then staff are willing to proactively address their knowledge and skills gaps | Burbage, 2020; Kabir, 2025b; Improvement Service, 2023 |
| 4.3.3 |  | If there are no negative repercussions for staff when admitting lack of ability and seeking support for applying TRAs | Because staff are willing to proactively address their knowledge and skills gaps | Practices can remain trauma informed despite individuals lacking specific knowledge, experience or skills | Burbage, 2020; Steinkopf, 2022b |
| 4.4.0 | Negative consequences of training | When staff are trained in TIC (specifically ‘Risking Connection’ (RC; Saakvitne et al., 2001) and ‘Restorative Approach’ (RA; Wilcox, 2012) | Because staff may gain knowledge about, be more willing to acknowledge, and get validation for trauma experiences. Whereas previously they considered their experience of VT to be an individual problem that resulted from their own deficiencies (Response shift) | Then burnout scores and vicarious trauma scores increased | Baker, 2018 |
