# Supplementary material
Source: Research Square preprint supplement (doi:10.21203/rs.3.rs-9984265/v1)
Supplement: Supplementary file 3 [file f62f6728af7b90469ad70d0b.docx]

## Additional file 1: Prominent Models and Frameworks

In the broader literature, there are a number of prominent models that claim to be based on an understanding of trauma for the care of children and young people. In terms of the settings that these are designed for, there are three main types: 1) Designed for a specific setting or population; 2) Designed for a specific setting or population but used in or adapted for a range of others; 3) Designed to be generic and applicable to a range of settings and populations. Notably, many models originate in secure/acute treatment or detention services in the USA. Whilst often being developed from similar underlying concerns, these models are characterised by a lack of conceptual similarity at a programme level, thereby contributing to the lack of coherence across the field. An example of this is the ‘Boy’s Town’ model, which despite being the subject of a great deal of implementation-fidelity research, is broken down into different key components in academic literature compared to the organisation’s own web site.

| **Reference** | **Model** | **Setting** | **Description** |
| --- | --- | --- | --- |
| Blaustein & Kinniburgh, 2018[1] | Attachment, Regulation and Competency (ARC) Framework: *Engagement, Psychoeducation & Routine* | Designed to translate across different systems of care, including primary (i.e., biological, kin, and foster parents), milieu (i.e., residential, group home), and organizational (i.e., teachers, youth program providers). (USA) | **Attachment:** Strengthening the caregiving system through enhancing supports, skills, and relational resources for adult caregivers  **Regulation:** Cultivating youth awareness and skill in identifying, understanding, tolerating, and managing internal experience  **Competency:** Addressing key factors associated with resilience |
| Bloom, 2005[2] | Sanctuary Model®:  7 commitments 4 pillars  S.E.L.F implementation tool | Acute inpatient psychiatric setting for adults who were traumatised as children. Adapted for a  range of organizations, including residential treatment centres, schools, domestic violence shelters, and drug and alcohol treatment centres. (USA) | **Commitments:**   1. Nonviolence 2. Emotional Intelligence 3. Social Learning 4. Democracy 5. Open Communication 6. Social Responsibility 7. Growth and Change   **Pillars:**   1. Shared knowledge 2. Shared values, 3. Shared language 4. Shared practice   **SELF (implementation):**   1. Safety, 2. Emotional management 3. Loss 4. Future |
| Boystown.org, 2026[3] | Boys Town Educational (Teaching Family) Model:  5 components | Residential, educational, and family-based settings. (USA) | 1. Teaching social skills for a positive learning environment 2. Empowering children to make good decisions 3. Correcting inappropriate behaviour through alternative behaviour 4. Reducing frequency and severity of referrals 5. Praising more and punishing less |
| Fixsen & Blase, 2018[4]; Fixsen et al, 2025[5] | Boys Town and the Teaching-Family Model: implementation fidelity | Residential, educational, and family-based settings. (USA) | 1. Relationship development 2. Teaching methods/ interaction 3. Motivation systems 4. Self-determination systems 5. Counselling approaches 6. Daily living routines |
| Forrest et al, 2018[6] | Building Communities of Care (BCC):  4 core considerations | Intensive residential and educational treatment programs for ages 12-22.  Program 1= mood, anxiety, or trauma-related symptoms Program 2= cognitive impairment or developmental delays and behavioural or mental health problems. (USA) | **Core Considerations:**   1. Environment 2. Clinical treatment 3. Community engagement 4. Behavioural interventions |
| Hanson and Lang, 2016[7] | Trauma-Informed Care:  4 principal components | Programs targeting children and youth impacted by traumatic events. (USA) | 1. Workforce Development 2. Trauma-Focused Services 3. Organisational Environment & Practices 4. Setting the Context: foundational shifts and organizational change processes |
| Harris & Fallot, 2001[8] | Trauma-informed service system:  5 guiding principles | Mental health and substance abuse agencies. Adapted for schools, general medical settings, and a variety of correctional settings, including juvenile justice. (USA) | 1. Safety 2. Trustworthiness 3. Choice 4. Collaboration 5. Empowerment |
| Holden et al, 2010[9] | The Children and Residential Experiences programme (CARE):  6 principles | Children’s residential care. (USA) | 1. Developmentally focused 2. Family involved 3. Relationship based 4. Competence centred 5. Trauma informed   Ecologically oriented |
| Knight & Borders, 2018[10] | Trauma-informed supervision:  5 core principles taken from Harris & Fallot, 2001 | (Clinical) Supervision in behavioural and mental health treatment settings (primarily for adults who were traumatised as children). (USA) | 1. Safety 2. Trustworthiness 3. Choice 4. Collaboration 5. Empowerment |
| Robinson & Philpot, 2016[11] | Restorative Parenting Recovery Programme (RPRP) ® | Residential care for children and young people that have experienced trauma and ACEs. (UK) | 1. Self-care 2. Forming relationships and attachments 3. Self-perception 4. Self-management and   self-awareness   1. Emotional competence |
| Taylor et al, 2018[12]; Atkinson, 2023[13]; McKeown, 2023[14] | SECURE STAIRS | Young people in the secure estate in England. (UK) | **SECURE:**  **S**taff with appropriate skill sets  **E**motionally resilient staff, remain child-centred  **C**ared for staff: supervision and support  **U**nderstanding of child development, attachment, trauma and other key theories  **R**eflective system, able to consider impact of trauma at all levels  “**E**very Interaction Matters”, whole system approach  **STAIRS:**  **S**coping presenting problems, key players,  and what change is wanted by whom  **T**argets agreed  **A**ctivators of difficulties with reaching targets identified  **I**nterventions at multiple levels that address those activators  **R**eview & revision of targets regularly  **S**ustainability planning from the outset |

References

1. Blaustein M, Kinniburgh K. Treating Traumatic Stress in Children and Adolescents: How to Foster Resilience through Attachment, Self-Regulation, and Competency: 2nd ed. New York: The Guilford Press; 2018.

2. Bloom SL. The Sanctuary Model of organizational change for children's residential treatment. Therapeutic Communities. 2005;26(1):61–78.

3. boystown.org. Boys Town Education Model. 2026. Accessed 08.04.26.

4. Fixsen DL, Blase KA. The Teaching-Family Model: The First 50 Years. Perspect Behav Sci. 2018; doi:10.1007/s40614-018-0168-3.

5. Fixsen DL, Baron RL, Daly DL, Tyler PM. Sustaining Fidelity for 50 Years: Boys Town and the Teaching-Family Model. Residential Treat Child Youth. 2025; doi:10.1080/0886571X.2025.2543391.

6. Forrest S, Gervais R, Lord KA, Sposato A, Martin L, Beserra K, Spinazzola J. Building communities of care: A comprehensive model for trauma-informed youth capacity building and behavior management in residential services. Residential Group Care & Treatment. 2018;35(4):265–285; doi:10.1080/0886571X.2018.1497930.

7. Hanson RF, Lang J. A Critical Look At Trauma-Informed Care Among Agencies and Systems Serving Maltreated Youth and Their Families. Child Maltreat. 2016; doi:10.1177/1077559516635274.

8. Harris M, Fallot RD. Envisioning a trauma-informed service system: a vital paradigm shift. New Dir Ment Health Serv. 2001; doi:10.1002/yd.23320018903.

9. Holden MJ, Izzo C, Nunno M, Smith EG, Endres T, Holden JC, Kuhn F. Children and residential experiences: a comprehensive strategy for implementing a research-informed program model for residential care. Child Welfare. 2010.

10. Knight C, Borders LD. Trauma-informed supervision: Core components and unique dynamics in varied practice contexts. The Clinical Supervisor. 2018; doi:10.1080/07325223.2018.1440680.

11. Robinson C, Philpot T. Healing Child Trauma Through Restorative Parenting: A Model for Supporting Children and Young People: London: Jessica Kingsley Publishers; 2016.

12. Taylor J, Shostak L, Rogers A, Mitchell P. Rethinking mental health provision in the secure estate for children and young people: a framework for integrated care (SECURE STAIRS). Safer Communities. 2018; doi:10.1108/SC-07-2018-0019.

13. Atkinson S, McKeown A, Caveney D, West E, Kennedy PJ, Macinnes S. The SECURE STAIRS framework: Preliminary evaluation of Trauma Informed Training Developments Within the Children and Young People’s Secure Estate. Community Ment Health J. 2023;59(6):1129–1135; doi:10.1007/s10597-023-01092-3.

14. McKeown A, Ramshaw G, Smith A, Atkinson S, Kennedy PJ. The SECURE STAIRS framework: preliminary evaluation of the impact on therapeutic climate in a secure children's home (SCH). SAFER COMMUNITIES. 2023; doi:10.1108/SC-11-2021-0044.
